# Supplementary material
Source: Springer Nature journal article supplement (https://www.springermedizin.de/resource/supplementary/12882_2013_601_MOESM2_ESM.pdf/9453908)

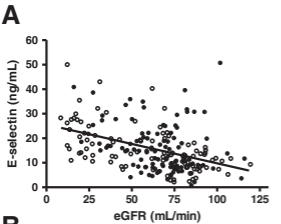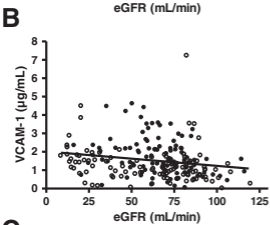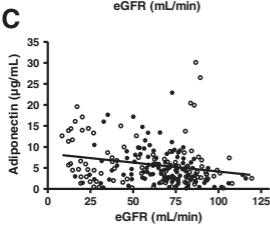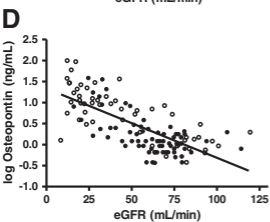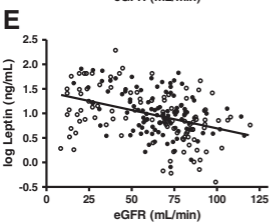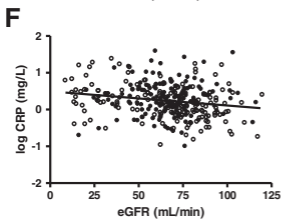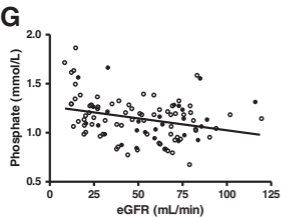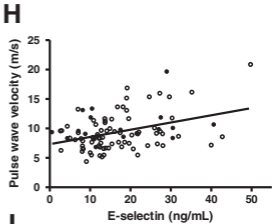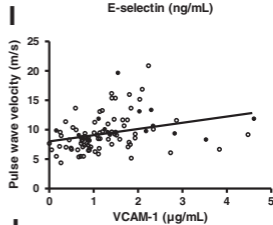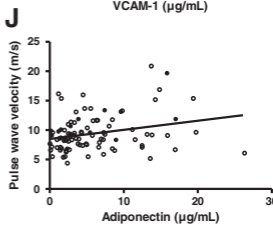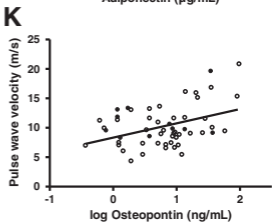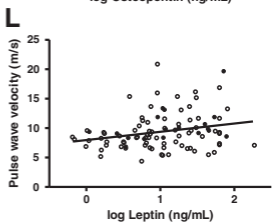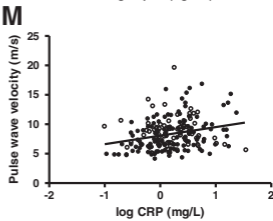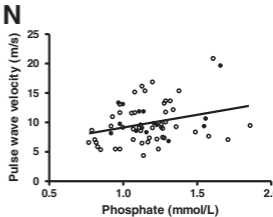

Supplement: MOESM2 [file 9453908]
